# Supplementary material for: 2022 Seoul Consensus on Clinical Practice Guidelines for Functional Constipation
Source: PubMed Central journal article supplement — J Neurogastroenterol Motil. 2023 Jul 30;29(3):271–305. doi: 10.5056/jnm23066 (PMC10334201; doi:10.5056/jnm23066), 2023-07-30
Supplement: jnm-29-3-271-supple.pdf [file jnm-29-3-271-supple.pdf]

**Supplementary Table 1.** Selected Key Questions Raised by the Guideline Development Committee

| Focus area                  | Indicator                                                                                                                                                                                                                                                                                                                                                                                                                                                                                                                                                                                                                                                                                                                                                                                                                                                                                                                                                                                                                                                                                                                                                                                                                                                                                                                                                                                                                                                                                                                                                                                                                                                                                                                                                                                                                                                                                                                                                                                                                                                        |
|-----------------------------|------------------------------------------------------------------------------------------------------------------------------------------------------------------------------------------------------------------------------------------------------------------------------------------------------------------------------------------------------------------------------------------------------------------------------------------------------------------------------------------------------------------------------------------------------------------------------------------------------------------------------------------------------------------------------------------------------------------------------------------------------------------------------------------------------------------------------------------------------------------------------------------------------------------------------------------------------------------------------------------------------------------------------------------------------------------------------------------------------------------------------------------------------------------------------------------------------------------------------------------------------------------------------------------------------------------------------------------------------------------------------------------------------------------------------------------------------------------------------------------------------------------------------------------------------------------------------------------------------------------------------------------------------------------------------------------------------------------------------------------------------------------------------------------------------------------------------------------------------------------------------------------------------------------------------------------------------------------------------------------------------------------------------------------------------------------|
| Definition and epidemiology | KQ1: What is the definition of chronic constipation?<br>KQ2: Does the prevalence of constipation increase with age?<br>KQ3: Is the prevalence of constipation higher in females than in males?                                                                                                                                                                                                                                                                                                                                                                                                                                                                                                                                                                                                                                                                                                                                                                                                                                                                                                                                                                                                                                                                                                                                                                                                                                                                                                                                                                                                                                                                                                                                                                                                                                                                                                                                                                                                                                                                   |
| Diagnosis                   | KQ4: Can the Bristol Stool Form scale be used to predict slow-transit constipation in patients with chronic constipation?<br>KQ5: Is digital rectal examination useful for identifying secondary constipation due to organic causes in the anorectum?<br>KQ6: Is digital rectal examination useful for screening for defecatory disorders?<br>KQ7: Should colonoscopy be performed in patients with chronic constipation?<br>KQ8: When should physiological testing be performed in chronic functional constipation?<br>KQ9: Is the balloon expulsion test useful for screening for defecatory disorders?<br>KQ10: Is anorectal manometry useful for diagnosing defecatory disorders in constipated patients?<br>KQ11: Is defecography useful for diagnosing structural abnormalities of the pelvic floor or pelvic dyssynergia in patients with chronic constipation?<br>KQ12: Is the colon transit time useful for differentiating defecatory disorders and slow-transit constipation in patients with chronic constipation?                                                                                                                                                                                                                                                                                                                                                                                                                                                                                                                                                                                                                                                                                                                                                                                                                                                                                                                                                                                                                                   |
| Management                  | KQ13: Is dietary fiber effective as a treatment for chronic constipation?<br>KQ14: Can exercise help relieve symptoms in adults with chronic constipation?<br>KQ 15: Are bulking agents effective as a treatment for chronic constipation?<br>KQ16: Are bulking agents safe as a treatment for chronic constipation?<br>KQ17: Are magnesium salts effective as a treatment for chronic constipation?<br>KQ18: Are magnesium salts safe as a treatment for chronic constipation?<br>KQ19: Can non-absorbable carbohydrates help relieve symptoms in adults with chronic constipation?<br>KQ20: Are non-absorbable carbohydrates safe for use in patients with chronic constipation?<br>KQ21: Is polyethylene glycol effective as a treatment for chronic constipation?<br>KQ22: Is long-term use of polyethylene glycol safe for patients with chronic constipation?<br>KQ23: Can stimulants help relieve symptoms in adults with chronic constipation?<br>KQ24: Are stimulant laxatives safe for patients with chronic constipation?<br>KQ25: Can probiotics help relieve symptoms in adults with chronic constipation?<br>KQ26: Can prucalopride help relieve symptoms in adults with chronic constipation?<br>KQ27: Can lubiprostone help relieve symptoms in adults with chronic constipation?<br>KQ28: Is linaclotide effective as a treatment for chronic constipation?<br>KQ29: Is biofeedback therapy an effective treatment for patients with defecatory disorders?<br>KQ30: Does biofeedback therapy exert a long-term effect on patients with defecatory disorders?<br>KQ31: Is enema effective as a treatment for chronic constipation?<br>KQ32: Is enema safe as a treatment for chronic constipation?<br>KQ33: What is the treatment for medically intractable (non-responsive patients with slow-transit constipation)?<br>KQ34: Is surgical management effective in improving the symptoms in patients with the obstructive defecation syndrome?<br>KQ35: Can sacral nerve stimulation help relieve symptoms in adults with chronic constipation? |

---

KQ, key question.

**Supplementary Table 2.** Conflict of Interest Register

| Name    | Relevant employee experience | Relevant consultation experience | Personal ownership interest | Non-personal pecuniary interest | Relevant honorarium experience | Action required |
|---------|------------------------------|----------------------------------|-----------------------------|---------------------------------|--------------------------------|-----------------|
| Cho YS  | None                         | None                             | None                        | None                            | None                           | None            |
| Shin JE | None                         | None                             | None                        | None                            | None                           | None            |
| Jung HK | None                         | None                             | None                        | None                            | None                           | None            |
| Park SY | None                         | None                             | None                        | None                            | None                           | None            |
| Lee YJ  | None                         | None                             | None                        | None                            | None                           | None            |
| Kang SJ | None                         | None                             | None                        | None                            | None                           | None            |
| Song KH | None                         | None                             | None                        | None                            | None                           | None            |
| Kim JW  | None                         | None                             | None                        | None                            | None                           | None            |
| Lim HC  | None                         | None                             | None                        | None                            | None                           | None            |
| Park HS | None                         | None                             | None                        | None                            | None                           | None            |
| Kim SJ  | None                         | None                             | None                        | None                            | None                           | None            |
| Cha RR  | None                         | None                             | None                        | None                            | None                           | None            |
| Bang KB | None                         | None                             | None                        | None                            | None                           | None            |
| Bang CS | None                         | None                             | None                        | None                            | None                           | None            |
| Yim SK  | None                         | None                             | None                        | None                            | None                           | None            |
| Ryoo SB | None                         | None                             | None                        | None                            | None                           | None            |
| Kye BH  | None                         | None                             | None                        | None                            | None                           | None            |
| Ji WB   | None                         | None                             | None                        | None                            | None                           | None            |
| Choi MY | None                         | None                             | None                        | None                            | None                           | None            |

**Supplementary Table 3.** Characteristics of the Comparison Studies Between Fiber Supplementation and Placebo

| Study (yr)                           | Disease | Country     | Number (C/T) | Age (mean)                | Sex (M/F) | Duration (wk) | Treatment (C/T)                                |
|--------------------------------------|---------|-------------|--------------|---------------------------|-----------|---------------|------------------------------------------------|
| Chey et al, <sup>94</sup> 2021       | CIC     | USA         | 46/30        | 42.7 ± 15.94              | 7/69      | 4             | Psyllium (12 g/day)<br>Kiwifruit (2 g/day)     |
| Wisten et al, <sup>103</sup> 2005    | CIC     | Sweden      | 10/10        | 74.9 ± 13.6               | 10/10     | 2             | Control<br>Mixed fiber (7.5 g)                 |
| Chan et al, <sup>93</sup> 2007       | CIC     | China       | 22/22        | 50.4 ± 12.72              | 13/42     | 4             | Control<br>Kiwifruit (2 g/day)                 |
| Maeta et al, <sup>99</sup> 2022      | CIC     | Japan       | 25/25        | 21                        | 0/50      | 2             | Control<br>Mixed fiber (Okara)                 |
| Venancio et al, <sup>102</sup> 2018  | CIC     | USA         | 19/17        | 26.1 ± 7.32               | 11/25     | 4             | Psyllium (5 g/day)<br>Mango fruit (300 mg)     |
| Attaluri et al, <sup>91</sup> 2011   | CIC     | USA         | 20/20        | NR                        | 3/37      | 6             | Psyllium (11 g/day)<br>Plum (100 mg)           |
| Erdogan et al, <sup>95</sup> 2016    | CIC     | USA         | 40/32        | 42.9                      | 6/66      | 4             | Psyllium (5 g/day)<br>Mixed fiber (SupraFiber) |
| Baek et al, <sup>92</sup> 2016       | CIC     | Korea       | 40/40        | 24.0 ± 4.1                | 9/71      | 8             | Control<br>Mixed fiber ( <i>F. carica</i> )    |
| Sairanen et al, <sup>100</sup> 2007  | CIC     | Finland     | 22/21        | 76                        | 11/32     | 6             | Control<br>Prunes (12 g), Linseed (6 g)        |
| Jung et al, <sup>97</sup> 2020       | CIC     | Korea       | 26/13        | 21.8 ± 2.0                | 0/39      | 4             | Wheat diet<br>Insoluble fiber (brown rice)     |
| Badiali et al, <sup>104</sup> 1995   | CIC     | Italy       | 12/12        | 40.1 ± 11                 | 2/22      | 8             | Control<br>Wheat bran (20 g)                   |
| Duncan et al, <sup>105</sup> 2018    | CIC     | Switzerland | 39/80        | 46.8                      | 8/111     | 4             | Control<br>Rye bread                           |
| Huh et al, <sup>96</sup> 2007        | CIC     | Korea       | 20/22        | 32.2 ± 6.9<br>31.2 ± 8.3  | NR        | 4             | Control<br>Mixed fiber (7.5 g)                 |
| Kim et al, <sup>98</sup> 2006        | CIC     | Korea       | 36/73        | 24.0 ± 4.2<br>24.6 ± 5.66 | NR        | 3             | Control<br>Mixed fiber (14 g)                  |
| Soltanian et al, <sup>101</sup> 2019 | CIC, DM | Iran        | 27/50        | 58.0                      | NR        | 12            | Control<br>Flaxseed (10 g)                     |

C/T, control/test; M, male; F, female; CIC, chronic idiopathic constipation; *F. carica*, *Ficus carica*; DM, diabetes mellitus; NR, not reported.

**Supplementary Table 4.** Studies Showing the Association Between Physical Activity and Constipation in Adults

| Author (yr)                       | Study design                                                                   | Definition of constipation    | Results                                                                                                                                                                                                                                   |
|-----------------------------------|--------------------------------------------------------------------------------|-------------------------------|-------------------------------------------------------------------------------------------------------------------------------------------------------------------------------------------------------------------------------------------|
| Wilson, <sup>113</sup> 2020       | Population-level, cross-sectional study in the USA, with 9963 adults           | < 3 stools/wk<br>BSFS 1 or 2  | < 3 stools/wk in patients with no vigorous recreational activity (OR [95% CI], 1.82 [1.11-2.97]) and for patients with no moderate recreational activity (OR [95% CI], 1.41 [1.08-1.85]). Insignificant difference in multivariate models |
| Moezi et al, <sup>20</sup> 2018   | Cross-sectional study in Southern Iran, with 9264 participants (age, 40-75 yr) | Based on the Rome IV criteria | Physical activity (OR, 0.56; 95% CI, 0.46-0.68)                                                                                                                                                                                           |
| Mazlyn et al, <sup>112</sup> 2013 | Database generated via survey                                                  | Constipation severity score   | Constipation severity score was associated with higher physical activity levels                                                                                                                                                           |
| Ragput et al, <sup>116</sup> 2014 | Cross-sectional study in India                                                 | Based on the Rome IV criteria | Physical exercise ( $P < 0.001$ )<br>Never, 40/129 (31.0%)<br>Sometimes, 23/238 (9.6%)<br>Habitual, 22/138 (15.9%)                                                                                                                        |

BSFS, Bristol stool form scale.

**Supplementary Table 5.** Studies Showing the Effectiveness of Exercise in the Management of Constipation

| Author (yr)                               | Study design                  | Patients                                                                | Intervention                                                                                                                                     | Results                                                                                                                                                                                                                   |
|-------------------------------------------|-------------------------------|-------------------------------------------------------------------------|--------------------------------------------------------------------------------------------------------------------------------------------------|---------------------------------------------------------------------------------------------------------------------------------------------------------------------------------------------------------------------------|
| Nour-Eldein et al, <sup>119</sup><br>2014 | Pre-post intervention study   | Twenty-three elderly patients with FC ( $\geq 60$ yr) at a nursing home | Lifestyle modification, including education (3 separate sessions at intervals of 2 wk)                                                           | Improvement of the PAC-QOL and PAC-SYM scores                                                                                                                                                                             |
| Speed et al, <sup>S1</sup><br>2010        | RCT, three-arm                | A total of 154 patients with FC (age $\geq 55$ yr)                      | Non-personalized dietary and lifestyle advice; personalized dietary and lifestyle advice, with reinforcement                                     | No evidence of improvement of the PAC-QOL or PAC-SYM scores                                                                                                                                                               |
| Meshkinpour et al, <sup>S2</sup><br>1998  | Pre-post intervention study   | Eight patients with constipation (SBM, less than 3/wk)                  | Four weeks of exercise using a treadmill                                                                                                         | No benefit                                                                                                                                                                                                                |
| Tanaway et al, <sup>S3</sup><br>2017      | RCT and pre-post intervention | A total of 125 obese women (age, 20-40 yr) with CC                      | Physical activity + routine care (n = 62).<br>Routine care (n = 63).<br>A 12-week program                                                        | Significant intragroup difference and inter-group difference<br>Improvement of the PAC-QOL and PAC-SYM scores                                                                                                             |
| Chin et al, <sup>120</sup><br>2006        | RCT and pre-post intervention | A total of 157 institutionalized participants (age, 64-94 yr)           | Resistance training, 40-60 min, 2/wk (n = 40)<br>Functional training (n = 41)<br>Combined training (n = 45)<br>Control (n = 31)<br>24-wk program | No effects of constipation symptoms or laxative use.                                                                                                                                                                      |
| De Schryver et al, <sup>121</sup><br>2005 | Pre-post intervention         | A total of 43 inactive patients (age > 45 yr)                           | Brisk walking for 30 min, $\geq 2$ /wk, 12-wk PA program                                                                                         | Significantly decreased number of fulfilled Rome criteria for constipation (2.7 to 1.5, $P < 0.05$ )<br>Significantly decreased rectosigmoid (17.5 to 9.6 hr) and total colon transit (79.2 to 58.4 hr, $P < 0.05$ ) time |

FC, functional constipation; PAC-QOL, Patient Assessment of Constipation Quality of Life; PAC-SYM, Patient Assessment of Constipation Symptoms; RCT, randomized controlled trial; SBM, spontaneous bowel movement.

**Supplementary Table 6.** Characteristics of the Comparison Studies Between Bulking Agent and Placebo

| Study (yr)                              | Design                      | Duration | Agents               | Patient       | Number (C/T) | Result                                                                                                                                                       |
|-----------------------------------------|-----------------------------|----------|----------------------|---------------|--------------|--------------------------------------------------------------------------------------------------------------------------------------------------------------|
| Ashraf et al, <sup>S4</sup><br>1995     | Double-blind study          | 8 wk     | Psyllium (5 g bid)   | CC            | 11/11        | 1. Improved stool frequency, 3.8 vs 2.9 stools/wk<br>2. Improved stool consistency, 3.2 vs 3.8<br>3. Reduced pain during defecation, 2.0 vs 2.6              |
| Fenn et al, <sup>S5</sup><br>1986       | Single-blind study          | 2 wk     | Psyllium (3.6 g tid) | CC            | 97/104       | Symptom relief (psyllium vs. placebo, 86.5% vs 47.4%)                                                                                                        |
| Nunes et al, <sup>S6</sup><br>2005      | Double-blind study          | 2 wk     | Psyllium (10 g/day)  | CC            | 30/30        | Symptom relief (psyllium vs placebo, 86.7% vs 30.0%)                                                                                                         |
| Soltanian et al, <sup>101</sup><br>2018 | Single-blind trial          | 12 wk    | Psyllium (10 g bid)  | CC with DM    | 27/24        | Improvement of the global constipation symptom score (psyllium vs placebo, 1.5 vs 0.5)                                                                       |
| Sturtzel et al, <sup>S7</sup><br>2010   | Parallel intervention trial | 12 wk    | Oat-bran (6.6 g tid) | CC in elderly | 15/15        | Use of laxatives vs placebo, 59% reduction vs 8% increase                                                                                                    |
| Baldiali et al, <sup>104</sup><br>1995  | Double-blind trial          | 2 wk     | Wheat bran           | CC            | 12/12        | 1. Improves bowel frequency (n/wk; bran vs placebo, 6.4 vs 5.1)<br>2. Reduction in the need for straining during defecation, bran vs placebo, 55.6% vs 28.6% |

C/T, control/test; bid, twice a day; tid, 3 times a day; CC, chronic constipation; DM, diabetes mellitus.

**Supplementary Table 7.** Characteristics of the Comparison Studies Between Non-absorbable Carbohydrate and Placebo

| Study (yr)                                       | Definition                           | Criteria used to define response                                   | Number of patients | Laxative used                                                                       | Duration of therapy |
|--------------------------------------------------|--------------------------------------|--------------------------------------------------------------------|--------------------|-------------------------------------------------------------------------------------|---------------------|
| Wesselius-De Casparis et al, <sup>142</sup> 1968 | Need for regular laxative use        | No requirement of additional laxatives during the treatment period | 103                | Lactulose (15 mL): 54<br>Placebo: 49                                                | 3 wk                |
| Sanders et al, <sup>141</sup> 1978               | Three or fewer BMs + another symptom | No increase in the bowel movement                                  | 42                 | Lactulose (30 mL): 19<br>Placebo: 23                                                | 2 wk                |
| Kasugai et al, <sup>143</sup> 2019               | Rome III (without excluding IBS-C)   | Number of patients with constipation stratified by severity        | 250                | Lactulose (13 g): 63<br>Lactulose (26 g): 63<br>Lactulose (39 g): 62<br>Placebo: 62 | 2 wk                |

BM, bowel movement; IBS-C, irritable bowel syndrome with constipation.

**Supplementary Table 8.** Characteristics of the Comparison Studies Between Polyethylene Glycol and Placebo

| Study (yr)                                 | Country           | Diagnostic criteria used to define FC                                                                                                                                                           | Primary endpoints                                                                                                                                                 | Total number of patients | Sex ratio (M/F) | Duration | Intervention                                         |
|--------------------------------------------|-------------------|-------------------------------------------------------------------------------------------------------------------------------------------------------------------------------------------------|-------------------------------------------------------------------------------------------------------------------------------------------------------------------|--------------------------|-----------------|----------|------------------------------------------------------|
| Corazziari et al, <sup>160</sup><br>1996   | Italy (6 centers) | < 2 BMs (at least 12 mo) or the presence of 2 or more of the following: < 3 BMs/wk, straining during defecation, sense of incomplete evacuation, and hard stools in at least 25% of defecations | Bowel frequency, normalization of bowel frequency                                                                                                                 | 48                       | 11/37           | 8 wk     | PEG 4000 (14.6 g)                                    |
| Dipalma et al, <sup>161</sup><br>2000      | USA (4 centers)   | ≤ 2 stools during a 7-day qualification period                                                                                                                                                  | ≥ 3 BMs/7 day                                                                                                                                                     | 151                      | 20/131          | 2 wk     | PEG 3350 (17 g)                                      |
| Corazziari et al, <sup>162</sup><br>2000   | Italy (4 centers) | < 2 BMs (at least 12 mo) or the presence of two or more of the following: < 3 BMs/wk, straining at defecation, sense of incomplete evacuation, and hard stools in at least 25% of defecations   | Complete remission of constipation with ≥ 3 BMs/wk, no use of laxatives, no straining at defecation, a feeling of complete evacuation, and no hard/pellety stools | 70                       | 12/58           | 20 wk    | PMF-100 (14.6 g twice daily). Dose reduction allowed |
| Dipalma et al, <sup>164</sup><br>2007      | USA (4 centers)   | Rome II and medication that had a 3% or greater incidence of constipation                                                                                                                       | Beyond Rome II                                                                                                                                                    | 100                      | 26/74           | 4 weeks  | Mirallax (17 g)                                      |
| Dipalma et al, <sup>165</sup><br>2007      | USA (50 centers)  | Modified Rome                                                                                                                                                                                   | 0.50 or greater rate of successful treatment weeks                                                                                                                | 304                      | 46/258          | 24 wk    | Mirallax (17 g)                                      |
|                                            |                   |                                                                                                                                                                                                 | 1. No use of rescue laxative                                                                                                                                      |                          |                 |          |                                                      |
|                                            |                   |                                                                                                                                                                                                 | 2. Satisfactory stool greater than or equal to 3 times/wk                                                                                                         |                          |                 |          |                                                      |
|                                            |                   |                                                                                                                                                                                                 | 3. One or fewer of the remaining three Rome-based symptom criteria                                                                                                |                          |                 |          |                                                      |
|                                            |                   |                                                                                                                                                                                                 | a. Straining during more than 25% of defecations                                                                                                                  |                          |                 |          |                                                      |
|                                            |                   |                                                                                                                                                                                                 | b. Lumpy or hard stools in more than 25% of defecations                                                                                                           |                          |                 |          |                                                      |
|                                            |                   |                                                                                                                                                                                                 | c. A sensation of incomplete evacuation in more than 25% of defecations                                                                                           |                          |                 |          |                                                      |
| Nakajima et al, <sup>166</sup><br>2019     | Japan             | Rome III                                                                                                                                                                                        | Change in the frequency of SBMs from baseline at week 2                                                                                                           | 156                      | 24/132          | 2 wk     | PEG 3350 (17 g)                                      |
| MV Cleveland et al, <sup>163</sup><br>2001 | USA               | ≤ 3 BMs/wk                                                                                                                                                                                      | Bowel movement, constipation symptoms                                                                                                                             | 23                       | 1/22            | 2 wk     | PEG-ELS (17 g)                                       |
| T McGraw et al, <sup>167</sup><br>2016     | USA               | Rome III                                                                                                                                                                                        | Inflammation of the oral mucosa                                                                                                                                   | 65                       | 14/51           | 2 wk     | PEG 3350 (17 g)                                      |

FC, functional constipation; M, male; F, female; BM, bowel movement; USA, United States of America; PEG, polyethylene glycol; SBM, spontaneous bowel movement; PEG-ELS, polyethylene glycol electrolyte lavage solution.



**Supplementary Table 9.** Characteristics of the Comparison Studies Between Probiotics and Placebo

| Study (yr)                               | Patients                     | Probiotics                                                                                                                                                                        | CFU                                           | Number (T/C) | Duration | Outcome                                 |
|------------------------------------------|------------------------------|-----------------------------------------------------------------------------------------------------------------------------------------------------------------------------------|-----------------------------------------------|--------------|----------|-----------------------------------------|
| Airaksinen et al, <sup>184</sup><br>2019 | FC, IBS-C                    | <i>Lactobacillus acidophilus</i> ,<br><i>Lacticaseibacillus paracaseis</i> ,<br><i>Bifidobacterium animalis</i>                                                                   | > 1010                                        | 78/78        | 2 wk     | Frequency, transit time                 |
| Bazzocchi et al, <sup>185</sup><br>2014  | FC                           | <i>Lactobacillus acidophilus</i> ,<br><i>Lacticaseibacillus paracaseis</i> ,<br><i>Bifidobacterium animalis</i>                                                                   | $2.4 \times 10^{10}$                          | 17/12        | 8 wk     | Symptom, consistency,<br>transit time   |
| Cudmore et al, <sup>186</sup><br>2017    | FC                           | <i>Bifidobacterium bifidum</i> ,<br><i>Lactobacillus rhamnosus</i> ,<br><i>Lactobacillus acidophilus</i>                                                                          | $6 \times 10^8$                               | 35/34        | 4 wk     | Frequency, consistency,<br>transit time |
| Del Piano et al, <sup>187</sup><br>2010  | Evacuation<br>disorder       | <i>Lactobacillus plantarum</i> ,<br><i>Bifidobacterium animalis lactis</i>                                                                                                        | $5 \times 10^9$                               | 220/80       | 30 day   | Frequency, consistency,<br>transit time |
| Dimidi et al, <sup>188</sup><br>2019     | FC                           | <i>Bifidobacterium lactis</i>                                                                                                                                                     | $1.5 \times 10^{10}$                          | 37/38        | 4 wk     | Frequency, consistency,<br>transit time |
| Ding et al, <sup>189</sup><br>2016       | FC                           | <i>Bifidobacterium longum</i><br><i>Lactobacillus acidophilus</i><br><i>Enterococcus faecalis</i>                                                                                 | $3 \times 10^7$                               | 48/45        | 12 wk    | Frequency, consistency,<br>transit time |
| Fateh et al, <sup>190</sup><br>2011      | FC                           | <i>Bifidobacterium longum</i> ,<br><i>Bifidobacterium breve</i><br><i>Lactobacillus casei</i> , <i>Lacticaseibacillus</i><br><i>rhamnosus</i> , <i>Streptococcus thermophilus</i> | 108                                           | 31/29        | 4 wk     | Frequency, symptoms                     |
| Favretto et al, <sup>191</sup><br>2013   | FC                           | <i>Bifidobacterium lactis</i> Bi-07                                                                                                                                               | 1010                                          | 15/15        | 30 day   | Frequency                               |
| Ibarra et al, <sup>192</sup><br>2018     | FC                           | <i>Bifidobacterium animalis</i> HN019                                                                                                                                             | 109 and 1010                                  | 152/76       | 4 wk     | Frequency, consistency,<br>transit time |
| Krammer et al, <sup>193</sup><br>2011    | Slow-transit<br>constipation | <i>Lactobacillus casei</i> Shirota                                                                                                                                                | $6.5 \times 10^9$                             | 12/12        | 4 wk     | Frequency, consistency,<br>transit time |
| Lim et al, <sup>194</sup><br>2018        | FC                           | <i>Bifidobacterium lactis</i> ,<br><i>Lactiplantibacillus plantarum</i>                                                                                                           | 1010                                          | 43/42        | 12 wk    | Frequency, consistency,<br>symptom      |
| Magro et al, <sup>195</sup><br>2014      | Chronic con-<br>stipation    | <i>Bifidobacterium lactis</i> ,<br><i>Lactobacillus acidophilus</i>                                                                                                               | > 109                                         | 26/21        | 2 wk     | Frequency, transit time                 |
| Martoni et al, <sup>196</sup><br>2019    | FC                           | <i>Lactobacillus acidophilus</i> , <i>Bifidobacterium</i><br><i>animalis lactis</i> , <i>Bifidobacterium longum</i> ,<br><i>Bifidobacterium bifidum</i>                           | $1.5 \times 10^{10}$                          | 48/46        | 4 wk     | Frequency, consistency                  |
| Mazlyn et al, <sup>197</sup><br>2013     | FC                           | <i>Lactobacillus casei</i> Shirota                                                                                                                                                | $3 \times 10^{10}$                            | 50/50        | 4 wk     | Frequency, consistency                  |
| Ojetti et al, <sup>198</sup><br>2014     | FC                           | <i>Limosilactobacillus reuteri</i> DSM17938                                                                                                                                       | 108                                           | 20/20        | 4 wk     | Frequency, symptom                      |
| Waitzberg et al, <sup>199</sup><br>2013  | FC                           | <i>Bifidobacterium lactis</i> , <i>Lacticaseibacillus</i><br><i>paracasei</i> , <i>Lacticaseibacillus rhamnosus</i> ,<br><i>Lactobacillus acidophilus</i>                         | < 109                                         | 49/50        | 30 day   | Frequency, consistency,<br>symptom      |
| Waller et al, <sup>200</sup><br>2011     | < 3 BMs/wk                   | <i>Bifidobacterium animalis</i> HN019                                                                                                                                             | $1.7 \times 10^{10}$ and<br>$1.8 \times 10^9$ | 59:29        | 2 wk     | Transit time, symptom                   |
| Yang et al, <sup>201</sup><br>2008       | < 3 BMs/wk                   | <i>Bifidobacterium lactis</i> DN173010                                                                                                                                            | $1.2 \times 10^{10}$                          | 63/63        | 2 wk     | Frequency, consistency,<br>symptom      |
| Madempudi et al, <sup>202</sup><br>2020  | FC                           | <i>Bacillus coagulans</i>                                                                                                                                                         | $2 \times 10^{10}$                            | 50/50        | 4 wk     | Frequency, consistency                  |
| Wang et al, <sup>203</sup><br>2021       | FC                           | <i>Streptococcus thermophilus</i> ,<br><i>Lactobacillus bulgaricus</i> ,<br><i>Bifidobacterium animalis</i>                                                                       | 1010                                          | 23/21        | 4 wk     | Frequency, consistency,<br>symptom      |

**Supplementary Table 9.** Continued

| Study (yr)                         | Patients          | Probiotics                                                                                                                                                                                         | CFU                | Number (T/C) | Duration | Outcome                         |
|------------------------------------|-------------------|----------------------------------------------------------------------------------------------------------------------------------------------------------------------------------------------------|--------------------|--------------|----------|---------------------------------|
| Botelho et al, <sup>204</sup> 2020 | FC                | <i>Lactobacillus acidophilus</i> , <i>Lactobacillus casei</i> ,<br><i>Lactococcus lactis</i> , <i>Bifidobacterium bifidum</i> ,<br><i>Bifidobacterium lactis</i>                                   | $5 \times 10^9$    | 21/14        | 30 day   | Frequency, consistency          |
| Zhang et al, <sup>205</sup> 2021   | FC and depression | <i>Lactocaseibacillus paracasei</i>                                                                                                                                                                | 1010               | 38/31        | 9 wk     | Symptom, microbiota             |
| Ghafar et al, <sup>206</sup> 2020  | FC                | <i>Lactobacillus acidophilus</i> , <i>Lactobacillus casei</i> ,<br><i>Lactococcus lactis</i> , <i>Bifidobacterium bifidum</i> ,<br><i>Bifidobacterium infantis</i> , <i>Bifidobacterium longum</i> | $5 \times 10^{10}$ | 36/36        | 7 day    | Frequency, symptom              |
| Araujo et al, <sup>207</sup> 2021  | FC                | <i>Lactobacillus acidophilus</i> , <i>Lactobacillus casei</i> ,<br><i>Lactococcus lactis</i> , <i>Bifidobacterium lactis</i> ,<br><i>Bifidobacterium bifidum</i>                                   | 109                | 25/20        | 30 day   | Frequency, consistency, symptom |
| Kang et al, <sup>208</sup> 2021    | FC                | <i>Bacillus coagulans</i>                                                                                                                                                                          | 109                | 40/40        | 8 wk     | Frequency, symptom              |

CFU, colony-forming units; T/C, test/control; FC, functional constipation defined by the Rome criteria; IBS-C, irritable bowel syndrome with constipation; BM, bowel movement.

**Supplementary Table 10.** Characteristics of the Comparison Studies Between Prucalopride and Placebo

| Study (yr)                                | Country      | Number of patients | Age (mean) | Sex (M/F) | Duration (wk) | Treatment protocol |
|-------------------------------------------|--------------|--------------------|------------|-----------|---------------|--------------------|
| Krogh et al, <sup>218</sup> 2002          | Denmark      | 22                 | 37.0       | 16/6      | 4             | 1 mg vs placebo    |
| Camilleri et al, <sup>214</sup> 2008      | USA, Belgium | 620                | 48.3       | 45/371    | 12            | 2 mg vs placebo    |
| Camilleri et al, <sup>219</sup> 2009      | USA          | 89                 | 82.9       | 24/65     | 4             | 4 mg vs placebo    |
| Quigley et al, <sup>213</sup> 2009        | Ireland      | 641                | 47.9       | 86/555    | 12            | 0.5 mg vs placebo  |
| Tack et al, <sup>215</sup> 2009           | Belgium      | 713                | 43.9       | 66/650    | 12            | 1 mg vs placebo    |
| Müller-Lissner et al, <sup>217</sup> 2010 | Germany      | 303                | 76.0       | 92/211    | 4             | 2 mg vs placebo    |
| Ke et al, <sup>216</sup> 2012             | China, Korea | 501                | 41.6       | 51/450    | 12            | 4 mg vs placebo    |
| Piessevaux et al, <sup>220</sup> 2015     | Europe       | 361                | 48.9       | 53/308    | 24            | 2 mg vs placebo    |
| Yiannakou et al, <sup>221</sup> 2015      | Europe       | 370                | 58.5       | NR        | 12            | 2 mg vs placebo    |

M, male; F, female; USA, United States of America; NR, not reported.

**Supplementary Table 11.** Characteristics of the Comparison Studies Between Lubiprostone and Placebo

| Study (yr)                          | Disease    | Country | Number (T/C) | Age (mean)  | Sex (M/F) | Duration (wk) | Treatment                            |
|-------------------------------------|------------|---------|--------------|-------------|-----------|---------------|--------------------------------------|
| Johanson et al, <sup>229</sup> 2007 | CIC        | USA     | 94/33        | 48.8        | 10/84     | 3             | Control/24 µg qd/24 µg bid/24 µg tid |
| Johanson et al, <sup>230</sup> 2008 | CIC        | USA     | 120/122      | 48.0 ± 12.3 | 13/107    | 4             | Control/24 µg bid                    |
| Barish et al, <sup>231</sup> 2010   | CIC        | USA     | 119/118      | 46.2 ± 12.1 | 15/104    | 4             | Control/24 µg bid                    |
| Fukudo et al, <sup>232</sup> 2011   | CIC        | Japan   | 128/42       | 39.9        | 13/115    | 3             | Control/8 µg bid/16 µg bid/24 µg bid |
| Fukudo et al, <sup>233</sup> 2015   | CIC        | Japan   | 62/62        | 42.7 ± 16.4 | 6/56      | 4             | Control/24 µg bid                    |
| Christie et al, <sup>234</sup> 2017 | CIC and DM | USA     | 37/39        | 56.9 ± 9.1  | 14/23     | 8             | Control/24 µg bid                    |

T/C, test/control; M, male; F, female; CIC, chronic idiopathic constipation; USA, United States of America; qd, once a day; bid, twice a day; DM, diabetes mellitus.

**Supplementary Table 12.** Characteristics of the Comparison Studies Between Linaclotide and Placebo

| Study (yr)                                              | Study population                                                                                                         | Treatment                                               | Control           | Endpoint                                                                                                                                                           |
|---------------------------------------------------------|--------------------------------------------------------------------------------------------------------------------------|---------------------------------------------------------|-------------------|--------------------------------------------------------------------------------------------------------------------------------------------------------------------|
| Fukudo et al, <sup>248</sup><br>2019                    | CIC (Rome III and<br>< 3 SBMs/wk)                                                                                        | Once daily<br>Linaclotide 500 µg<br>(0.5 mg) for 4 wk   | Placebo for 4 wk  | ≥ 3 CSBMs and an increase of ≥ 1 CSBM/wk from the<br>baseline at 4 wk or ≥ 3 SBMs and an increase of ≥ 1<br>SBM/wk from the baseline at 4 wk                       |
| Schoenfeld et al, <sup>247</sup><br>2018                | CIC (Rome III and<br>< 3 SBMs/wk)                                                                                        | Once daily<br>Linaclotide 72 µg or<br>145 µg for 12 wk  | Placebo for 12 wk | ≥ 3 CSBMs and an increase of ≥ 1 CSBM/wk from the<br>baseline in the same week for ≥ 9 wk of the 12-wk treatment<br>period                                         |
| Lacy et al, <sup>246</sup><br>2015                      | CIC (Rome II, < 3<br>SBMs/wk, and<br>average abdominal<br>bloating scores of<br>more than 5 during<br>the 14-day period) | Once daily<br>Linaclotide 145 µg or<br>290 µg for 12 wk | Placebo for 12 wk | ≥ 3 CSBMs/wk and an increase of ≥ 1 CSBM/wk from the<br>baseline at 12 wk<br>≥ 3 CSBMs/wk at 4 and 12 wk, an increase of ≥ 1<br>CSBM/wk from the baseline at 12 wk |
| Lembo<br>(2011 trial 303)<br>et al, <sup>245</sup> 2011 | CIC (Rome II and<br>< 3 SBMs/wk)                                                                                         | Once daily<br>Linaclotide 145 µg or<br>290 µg for 12 wk | Placebo for 12 wk | ≥ 3 CSBMs and an increase of ≥ 1 CSBM/wk from the<br>baseline in the same week for ≥ 9 wk of the 12-wk treatment<br>period                                         |
| Lembo<br>(2011 trial 01)<br>et al, <sup>236</sup> 2011  | CIC (Rome II and<br>< 3 SBMs/wk)                                                                                         | Once daily<br>Linaclotide 145 µg or<br>290 µg for 12 wk | Placebo for 12 wk | ≥ 3 CSBMs and an increase of ≥ 1 CSBM/wk from the<br>baseline in the same week for ≥ 9 wk of the 12-wk treatment<br>period                                         |

CIC, chronic idiopathic constipation; CSBM, complete spontaneous bowel movement; SBM, spontaneous bowel movement.

**Supplementary Table 13.** Main Outcomes of the Comparison Studies Between Linaclotide and Placebo

| Study (yr)                                        | Symptomatic improvement                                                                     | Adverse events                                                                                                           |
|---------------------------------------------------|---------------------------------------------------------------------------------------------|--------------------------------------------------------------------------------------------------------------------------|
| Fukudo et al, <sup>248</sup> 2019                 | 42/92 (500 µg), 11/89 (placebo) at 4 wk                                                     | 26/92 (linaclotide), 13/90 (placebo) (diarrhea was most common) (12/92, 1/90)                                            |
| Schoenfeld et al, <sup>247</sup> 2018             | 55/411 (72 µg), 51/411 (145 µg), 19/401 (placebo) at 12 wk                                  | At least 1 AE, 143/411 (72 µg), 145/411 (145 µg), 107/401 (placebo) (diarrhea was most common) (79/411, 91/144, 28/401)  |
| Lacy et al, <sup>246</sup> 2015                   | 24/153 (145 µg), 26/159 (290 µg), 13/171 (placebo) for at least 9 of the 12 wk of treatment | At least 1 AE, 75/153 (145 µg), 76/160 (290 µg), 65/173 (placebo) (diarrhea was most common) (9/153, 27/160, 4/173)      |
| Lembo (2011 trial 303) et al, <sup>245</sup> 2011 | 46/217 (145 µg), 42/216 (290 µg), 7/209 (placebo) for at least 9 of the 12 wk of treatment  | At least 1 AE, 260/430 (145 µg), 235/422 (290 µg), 221/424 (placebo) (diarrhea was most common) (69/430, 60/422, 20/424) |
| Lembo (2011 trial 01) et al, <sup>236</sup> 2011  | 34/213 (145 µg), 43/202 (290 µg), 13/215 (placebo) for at least 9 of the 12 wk of treatment | At least 1 AE, 260/430 (145 µg), 235/422 (290 µg), 221/424 (placebo) (diarrhea was most common) (69/430, 60/422, 20/424) |

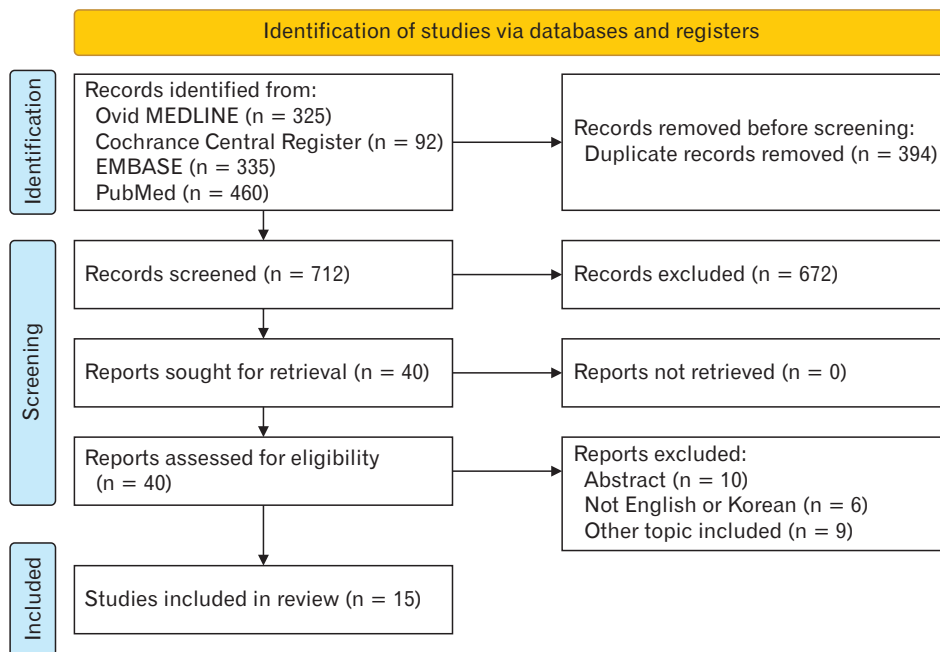

**Supplementary Figure 1.** Flow chart of the literature screening process and results of the efficacy of fiber supplementation in patients with chronic constipation.

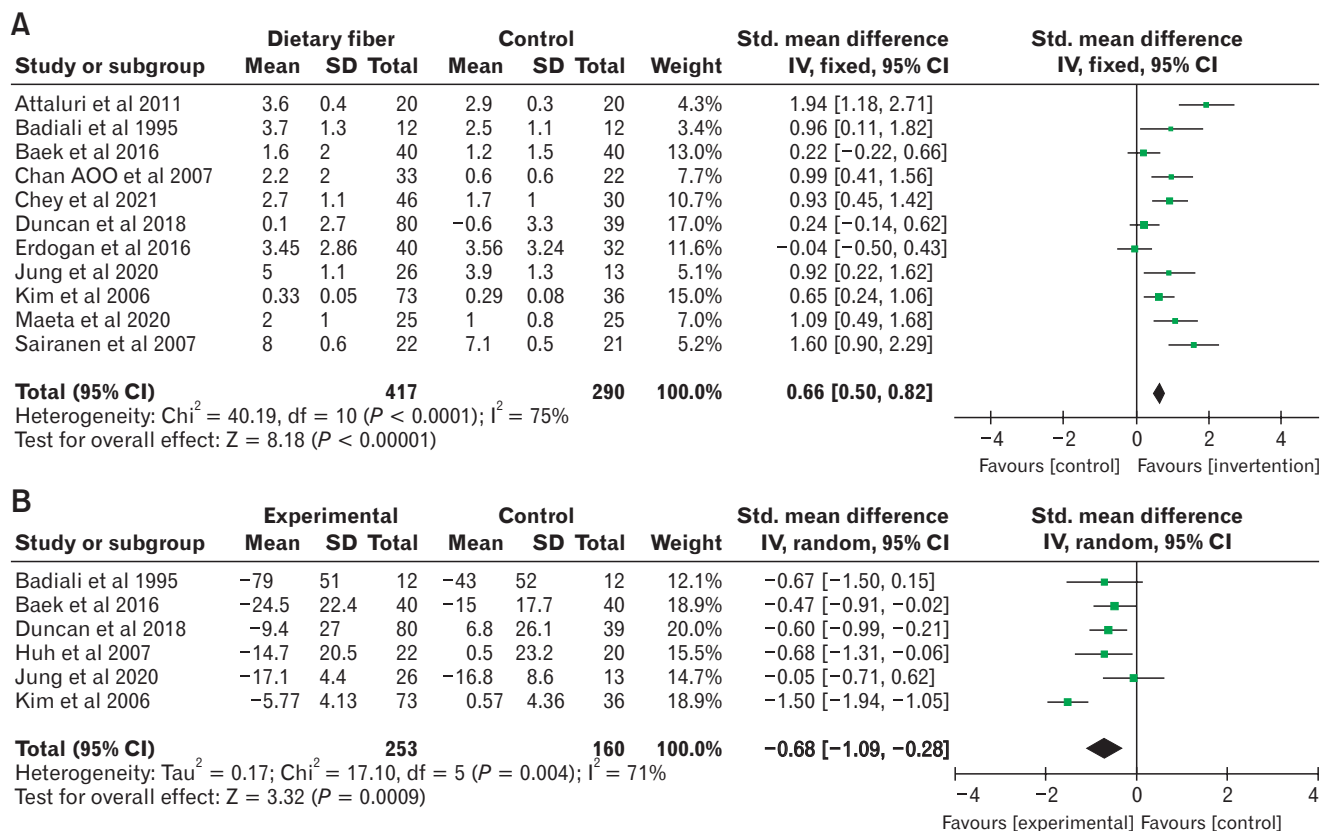

**Supplementary Figure 2.** Efficacy of fiber supplementation versus placebo in the treatment of chronic constipation (A) Forrest plot of spontaneous bowel movement changes during the first 4 weeks. (B) Forrest plot of changes in the colon transit time during the first 4-8 weeks.



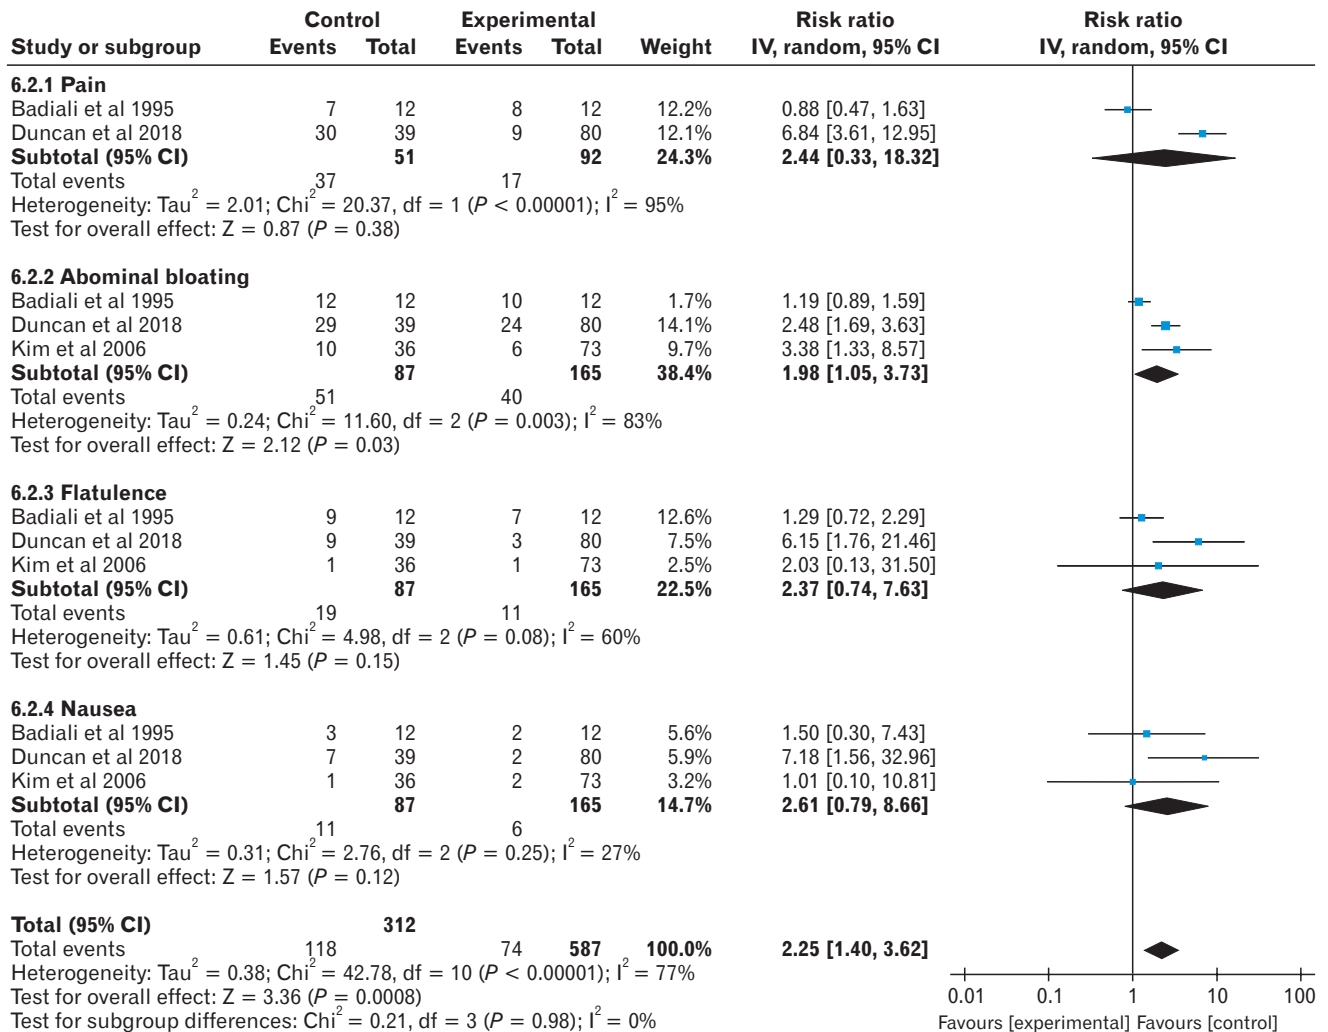

Supplementary Figure 3. Forrest plot for patients with adverse events in the fiber and placebo groups.

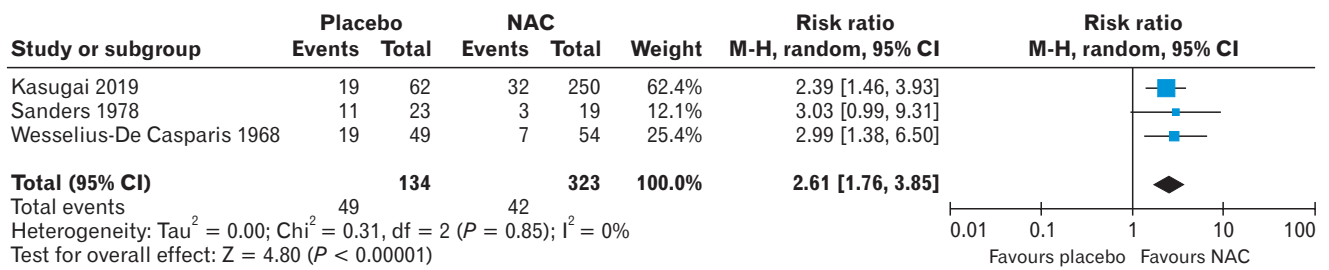

**Supplementary Figure 4.** Forrest plot of the efficacy of non-absorbable carbohydrates (NAC) versus placebo in the treatment of chronic constipation (treatment failure). M-H, Mantel-Haenszel.

### A Diarrhea

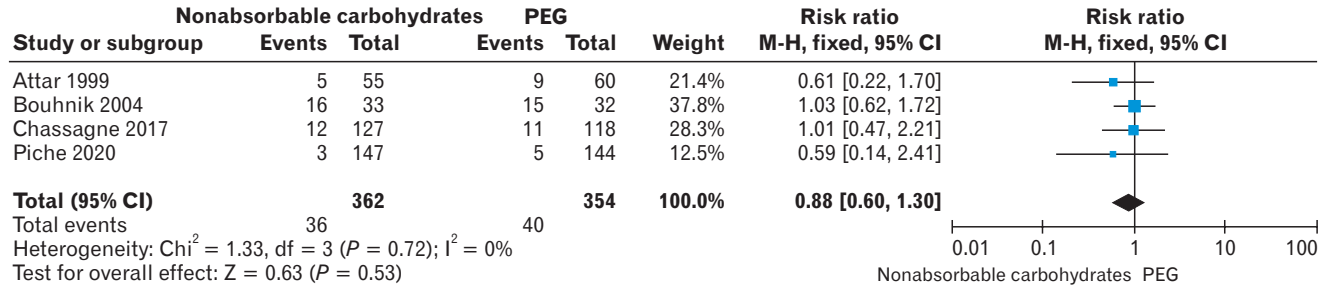

### B Abdominal pain

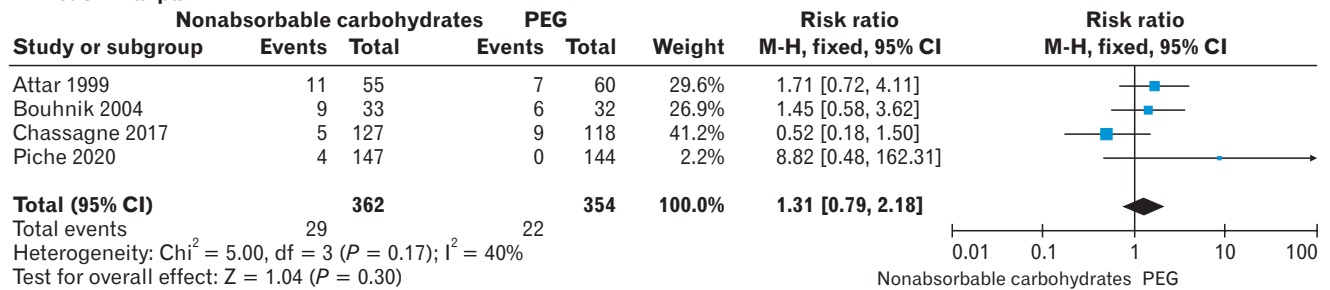

### C Bloating

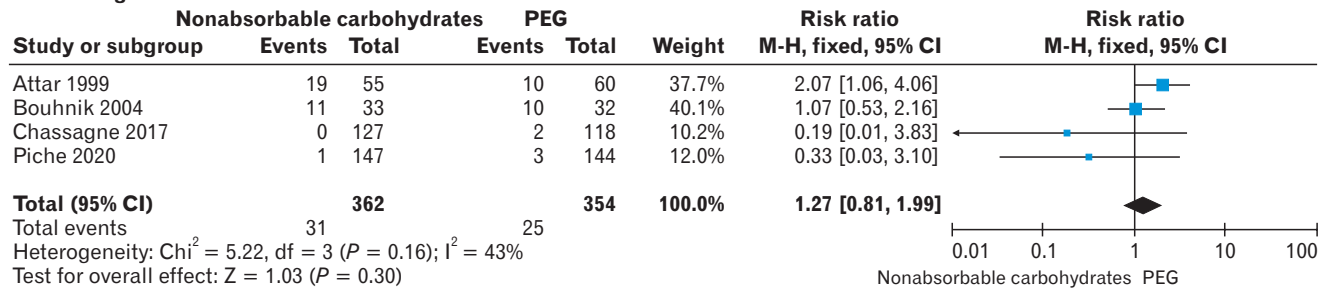

### D Flatulence

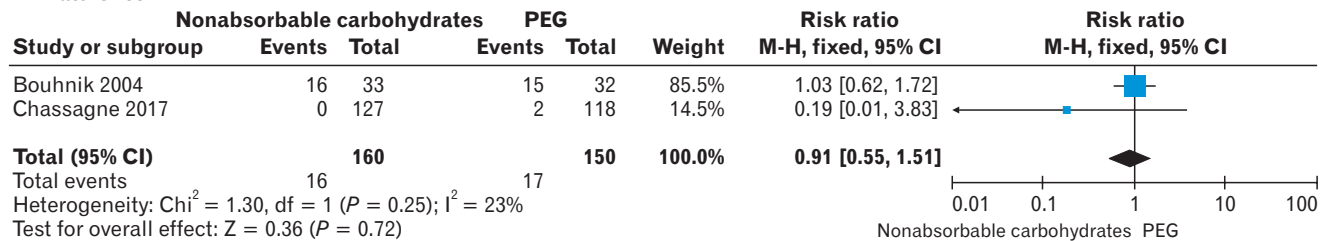

**Supplementary Figure 5.** Forrest plot for patients with adverse events between the non-absorbable carbohydrate and polyethylene glycol (PEG) groups. M-H, Mantel-Haenszel.

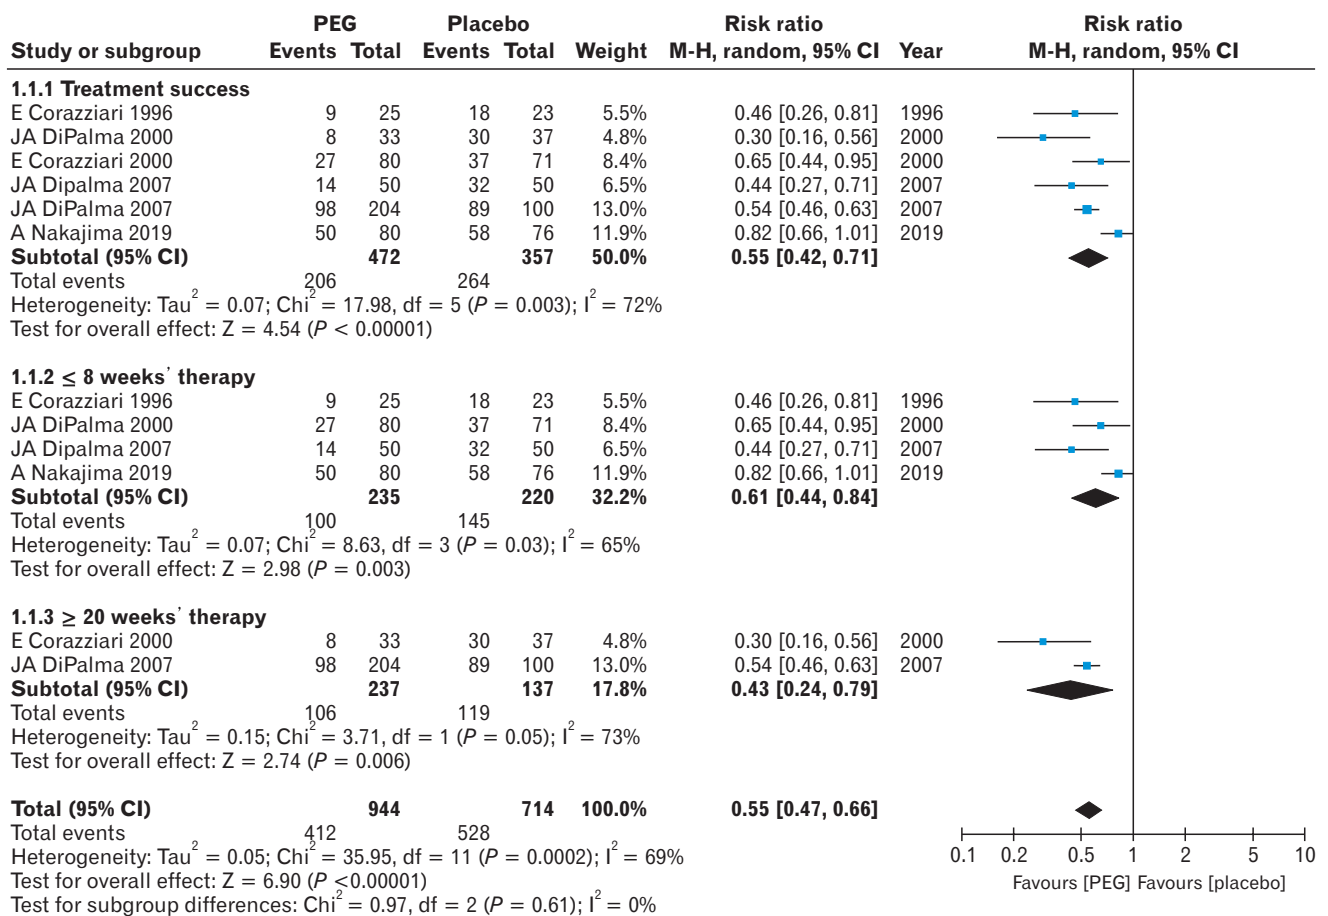

**Supplementary Figure 6.** Forrest plot of the efficacy of polyethylene glycol (PEG) versus placebo in the treatment of chronic constipation (treatment success and treatment success by the duration of treatment). M-H, Mantel-Haenszel.

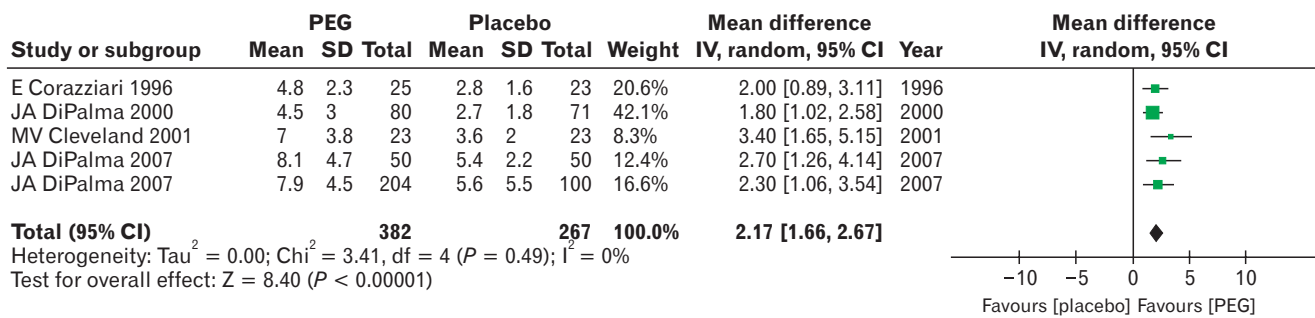

**Supplementary Figure 7.** Forrest plot of the efficacy of polyethylene glycol (PEG) versus placebo in the treatment of chronic constipation (stool frequency).

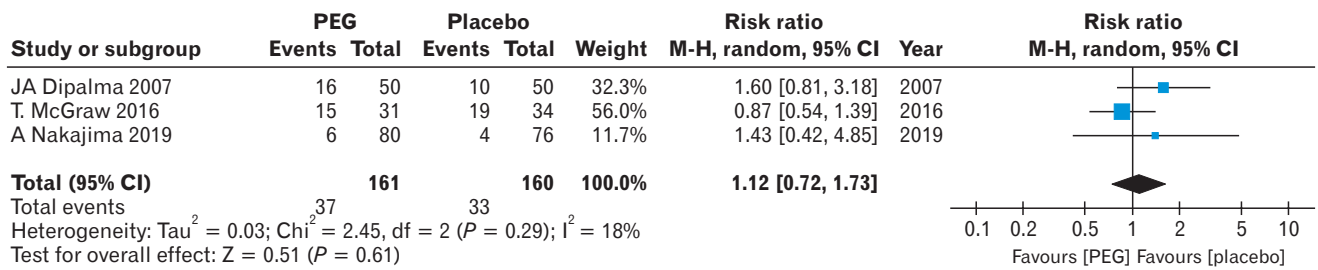

**Supplementary Figure 8.** Forrest plot of the efficacy of polyethylene glycol (PEG) versus placebo in the treatment of chronic constipation (adverse event). M-H, Mantel-Haenszel.

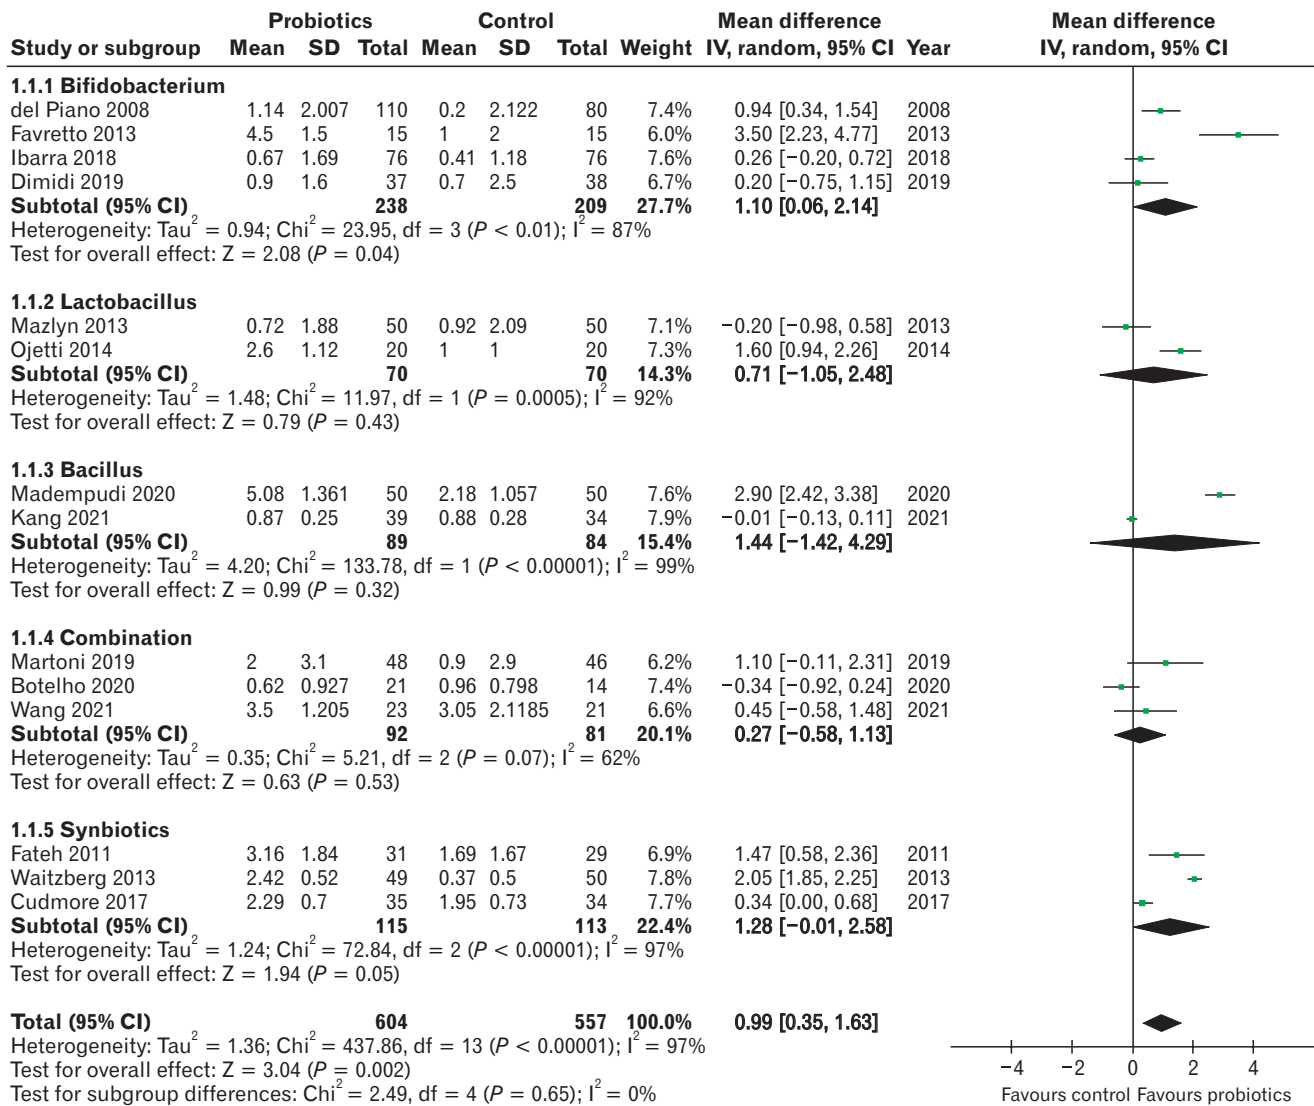

Supplementary Figure 9. Change in spontaneous bowel movements per week at 4 weeks in the probiotic and placebo groups.

| Summary of findings:                                   |                                                                    |                                                            |                             |                                                |                                         |          |
|--------------------------------------------------------|--------------------------------------------------------------------|------------------------------------------------------------|-----------------------------|------------------------------------------------|-----------------------------------------|----------|
| <b>Probiotics compared to Placebo for Constipation</b> |                                                                    |                                                            |                             |                                                |                                         |          |
| <b>Patient or population:</b> Constipation             |                                                                    |                                                            |                             |                                                |                                         |          |
| <b>Setting:</b>                                        |                                                                    |                                                            |                             |                                                |                                         |          |
| <b>Intervention:</b> Probiotics                        |                                                                    |                                                            |                             |                                                |                                         |          |
| <b>Comparison:</b> Placebo                             |                                                                    |                                                            |                             |                                                |                                         |          |
| Outcomes                                               | Anticipated absolute effects*<br>(95% CI)                          |                                                            | Relative effect<br>(95% CI) | N <sub>o</sub> of<br>participants<br>(studies) | Certainty of<br>the evidence<br>(GRADE) | Comments |
|                                                        | Risk with<br>Placebo                                               | Risk with<br>Probiotics                                    |                             |                                                |                                         |          |
| Change of SBM per week at 4 weeks                      | The mean change of SBM per week at 4 weeks was <b>1.16/week</b>    | MD <b>0.99/week higher</b><br>(0.35 higher to 1.63 higher) | -                           | 1161<br>(14 RCTs)                              | ⊕⊕○○<br>Low <sup>a,b</sup>              |          |
| Change of SBM per week at 2 weeks                      | The mean change of SBM per week at 2 weeks was <b>0.27/week</b>    | MD <b>0.79/week higher</b><br>(0.27 higher to 1.3 higher)  | -                           | 402<br>(4 RCTs)                                | ⊕⊕○○<br>Low <sup>a,c</sup>              |          |
| Change of SBM per week at 8-12 weeks                   | The mean change of SBM per week at 8-12 weeks was <b>1.07/week</b> | MD <b>0.95/week higher</b><br>(0.17 higher to 1.73 higher) | -                           | 251<br>(3 RCTs)                                | ⊕⊕⊕○<br>Moderate <sup>c</sup>           |          |
| Consistency                                            | -                                                                  | SMD <b>0.48 SD higher</b><br>(0.05 higher to 0.9 higher)   | -                           | 875<br>(9 RCTs)                                | ⊕⊕○○<br>Low <sup>b,c</sup>              |          |

\*The risk in the intervention group (and its 95% confidence interval) is based on the assumed risk in the comparison group and the relative effect of the intervention (and its 95% CI).

CI: confidence interval; MD: mean difference; SMD: standardised mean difference

**GRADE Working Group grades of evidence**  
**High certainty:** we are very confident that the true effect lies close to that of the estimate of the effect.  
**Moderate certainty:** we are moderately confident in the effect estimate: the true effect is likely to be close to the estimate of the effect, but there is a possibility that it is substantially different.  
**Low certainty:** our confidence in the effect estimate is limited: the true effect may be substantially different from the estimate of the effect.  
**Very low certainty:** we have very little confidence in the effect estimate: the true effect is likely to be substantially different from the estimate of effect.

**Explanations**  
a. High risk of bias  
b. Inconsistent results  
c. Low number of patients

Supplementary Figure 10. Summary of findings: probiotics compared to placebo for constipation.



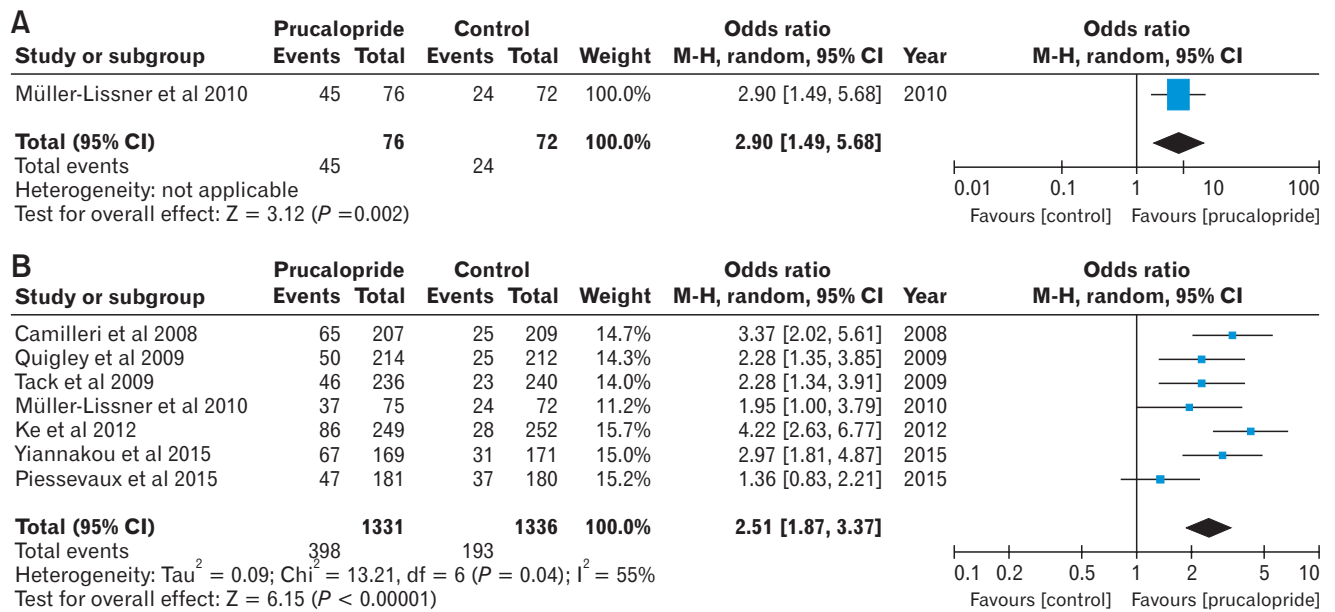

**Supplementary Figure 11.** Forrest plot for patients with > 3 spontaneous bowel movements per week. (A) 1 mg prucalopride versus placebo. (B) 2 mg prucalopride versus placebo. M-H, Mantel-Haenszel.

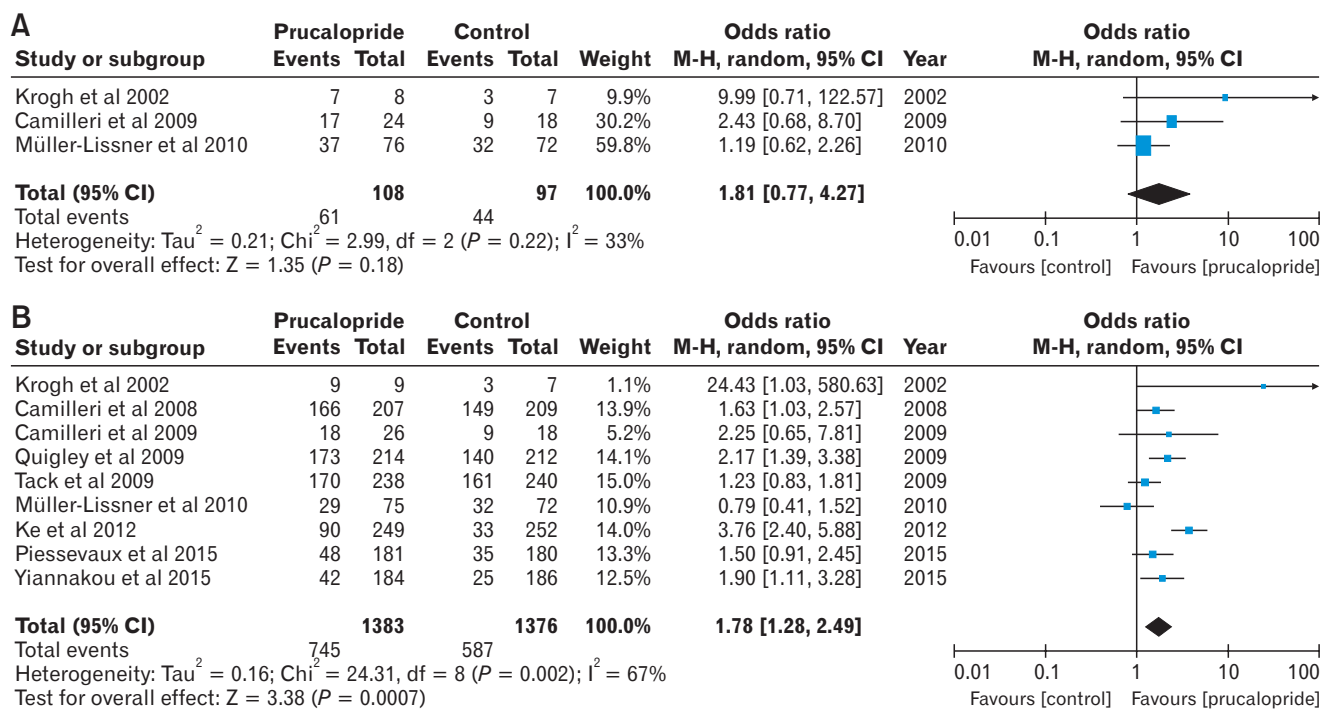

**Supplementary Figure 12.** Forrest plot for patients with adverse events. (A) 1 mg prucalopride versus placebo. (B) 2 mg prucalopride versus placebo. M-H, Mantel-Haenszel.

| Summary of findings:                                                                                                                                                                                               |                                        |                                      |                                  |                              |                                   |          |
|--------------------------------------------------------------------------------------------------------------------------------------------------------------------------------------------------------------------|----------------------------------------|--------------------------------------|----------------------------------|------------------------------|-----------------------------------|----------|
| Prucalopride compared to Placebo for [health problem]                                                                                                                                                              |                                        |                                      |                                  |                              |                                   |          |
| Patient or population: [health problem]                                                                                                                                                                            |                                        |                                      |                                  |                              |                                   |          |
| Setting:                                                                                                                                                                                                           |                                        |                                      |                                  |                              |                                   |          |
| Intervention: Prucalopride                                                                                                                                                                                         |                                        |                                      |                                  |                              |                                   |          |
| Comparison: Placebo                                                                                                                                                                                                |                                        |                                      |                                  |                              |                                   |          |
| Outcomes                                                                                                                                                                                                           | Anticipated absolute effects* (95% CI) |                                      | Relative effect (95% CI)         | No of participants (studies) | Certainty of the evidence (GRADE) | Comments |
|                                                                                                                                                                                                                    | Risk with Placebo                      | Risk with Prucalopride               |                                  |                              |                                   |          |
| Patients with >3 SCBM per week (Prucalopride 1mg vs Placebo)                                                                                                                                                       | 333 per 1,000                          | <b>592 per 1,000</b><br>(427 to 740) | <b>OR 2.90</b><br>(1.49 to 5.68) | 148<br>(1 RCT)               | ⊕⊕⊕⊕<br>High                      |          |
| Patients with >3 SCBM per week (Prucalopride 2mg vs Placebo)                                                                                                                                                       | 144 per 1,000                          | <b>298 per 1,000</b><br>(240 to 363) | <b>OR 2.51</b><br>(1.87 to 3.37) | 2667<br>(7 RCTs)             | ⊕⊕⊕⊕<br>High                      |          |
| Occurrence of adverse event (Prucalopride 1mg vs Placebo)                                                                                                                                                          | 454 per 1,000                          | <b>600 per 1,000</b><br>(390 to 780) | <b>OR 1.81</b><br>(0.77 to 4.27) | 205<br>(3 RCTs)              | ⊕⊕⊕⊕<br>High                      |          |
| Occurrence of adverse event (Prucalopride 2mg vs Placebo)                                                                                                                                                          | 485 per 1,000                          | <b>631 per 1,000</b><br>(564 to 693) | <b>OR 1.81</b><br>(1.37 to 2.39) | 3694<br>(9 RCTs)             | ⊕⊕⊕⊕<br>High                      |          |
| *The risk in the intervention group (and its 95% confidence interval) is based on the assumed risk in the comparison group and the relative effect of the intervention (and its 95% CI).                           |                                        |                                      |                                  |                              |                                   |          |
| CI: confidence interval; OR: odds ratio                                                                                                                                                                            |                                        |                                      |                                  |                              |                                   |          |
| <b>GRADE Working Group grades of evidence</b>                                                                                                                                                                      |                                        |                                      |                                  |                              |                                   |          |
| <b>High certainty:</b> we are very confident that the true effect lies close to that of the estimate of the effect.                                                                                                |                                        |                                      |                                  |                              |                                   |          |
| <b>Moderate certainty:</b> we are moderately confident in the effect estimate: the true effect is likely to be close to the estimate of the effect, but there is a possibility that it is substantially different. |                                        |                                      |                                  |                              |                                   |          |
| <b>Low certainty:</b> our confidence in the effect estimate is limited: the true effect may be substantially different from the estimate of the effect.                                                            |                                        |                                      |                                  |                              |                                   |          |
| <b>Very low certainty:</b> we have very little confidence in the effect estimate: the true effect is likely to be substantially different from the estimate of effect.                                             |                                        |                                      |                                  |                              |                                   |          |

Supplementary Figure 13. Summary of findings: prucalopride compared to placebo for chronic idiopathic constipation.

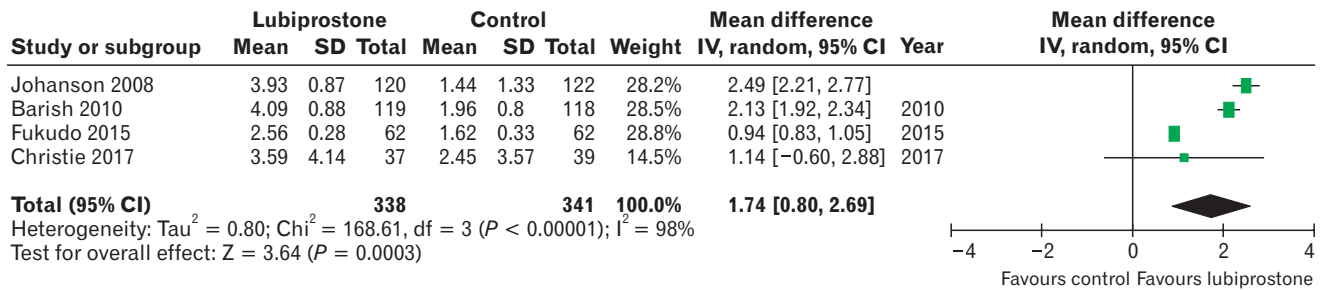

**Supplementary Figure 14.** Change in spontaneous bowel movements per week at 4 weeks in the lubiprostone and placebo groups.

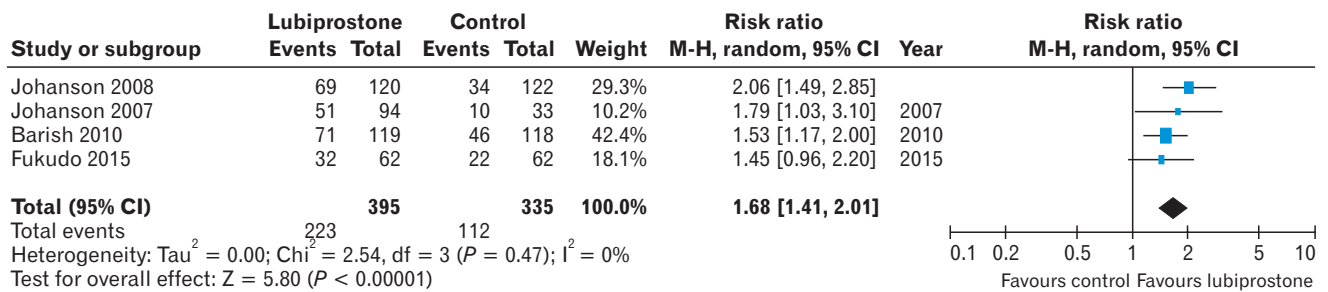

**Supplementary Figure 15.** Patients with > 3 spontaneous bowel movements per week at 4 weeks in the lubiprostone and placebo groups. M-H, Mantel-Haenszel.

| Outcomes                             | Anticipated absolute effects* (95% CI)                           |                                                         | Relative effect (95% CI)      | No of participants (studies) | Certainty of the evidence (GRADE) | Comments |
|--------------------------------------|------------------------------------------------------------------|---------------------------------------------------------|-------------------------------|------------------------------|-----------------------------------|----------|
|                                      | Risk with Placebo                                                | Risk with Lubiprostone                                  |                               |                              |                                   |          |
| Change of SBM per week at 4 weeks    | The mean change of SBM per week at 4 weeks was <b>1.87</b> /week | MD <b>1.74 /week higher</b> (0.8 higher to 2.69 higher) | -                             | 679 (4 RCTs)                 | ⊕⊕⊕⊕<br>High                      |          |
| Patients with >3 SBM/week at 4 weeks | 334 per 1,000                                                    | <b>562 per 1,000</b> (471 to 672)                       | <b>RR 1.68</b> (1.41 to 2.01) | 730 (4 RCTs)                 | ⊕⊕⊕⊕<br>High                      |          |
| Patients with SBM within 24 hours    | 321 per 1,000                                                    | <b>587 per 1,000</b> (494 to 693)                       | <b>RR 1.83</b> (1.54 to 2.16) | 900 (5 RCTs)                 | ⊕⊕⊕⊕<br>High                      |          |
| Overall adverse event                | 167 per 1,000                                                    | <b>428 per 1,000</b> (334 to 550)                       | <b>RR 2.56</b> (2.00 to 3.29) | 900 (5 RCTs)                 | ⊕⊕⊕⊕<br>High                      |          |
| Serious adverse event                | 39 per 1,000                                                     | <b>51 per 1,000</b> (24 to 109)                         | <b>RR 1.30</b> (0.81 to 2.78) | 658 (4 RCTs)                 | ⊕⊕⊕⊕<br>High                      |          |

\*The risk in the intervention group (and its 95% confidence interval) is based on the assumed risk in the comparison group and the relative effect of the intervention (and its 95% CI).

CI: confidence interval; MD: mean difference; RR: risk ratio

**GRADE Working Group grades of evidence**  
**High certainty:** we are very confident that the true effect lies close to that of the estimate of the effect.  
**Moderate certainty:** we are moderately confident in the effect estimate: the true effect is likely to be close to the estimate of the effect, but there is a possibility that it is substantially different.  
**Low certainty:** our confidence in the effect estimate is limited: the true effect may be substantially different from the estimate of the effect.  
**Very low certainty:** we have very little confidence in the effect estimate: the true effect is likely to be substantially different from the estimate of effect.

**Supplementary Figure 16.** Summary of findings: lubiprostone compared to placebo for chronic idiopathic constipation.

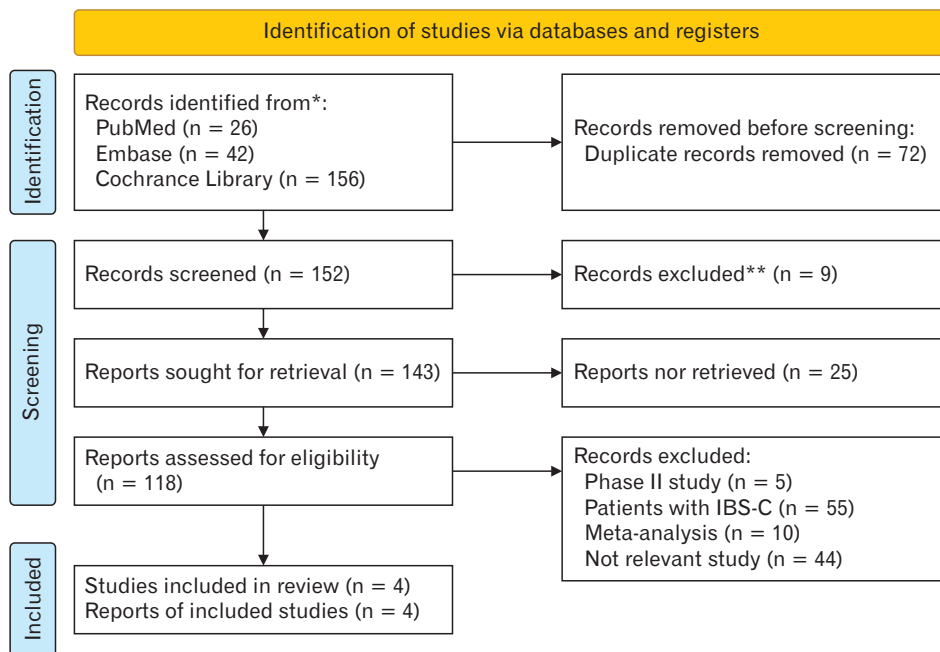

**Supplementary Figure 17.** Flow chart of the literature screening process and results of the efficacy of linaclotide in patients with chronic constipation.

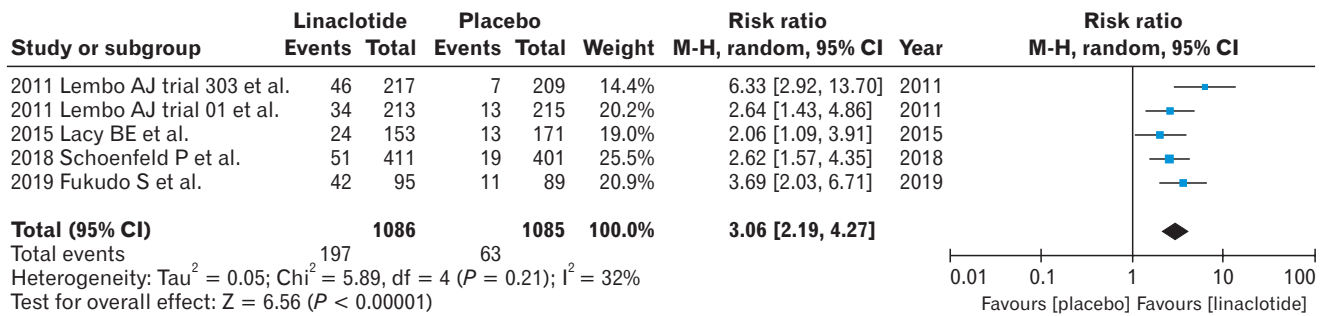

**Supplementary Figure 18.** Efficacy of linacotide versus placebo in the treatment of chronic constipation (overall pooled analysis).



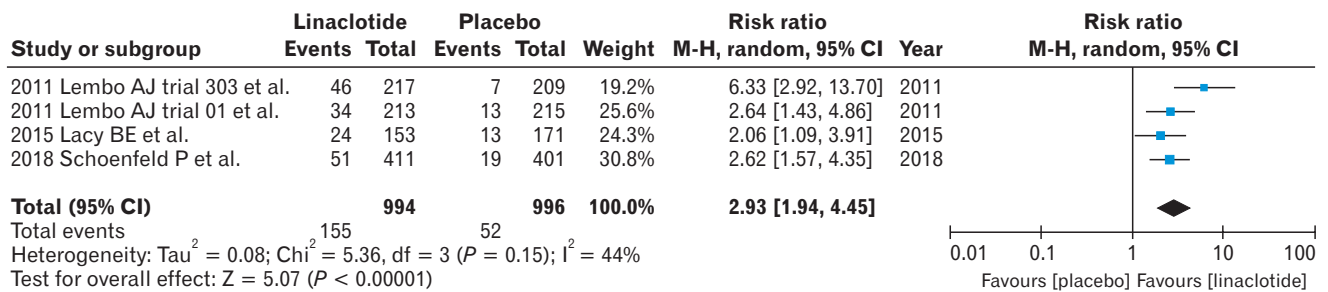

**Supplementary Figure 19.** Efficacy of linaclotide versus placebo in the treatment of chronic constipation (subgroup analysis with linaclotide 145 µg). M-H, Mantel-Haenszel.

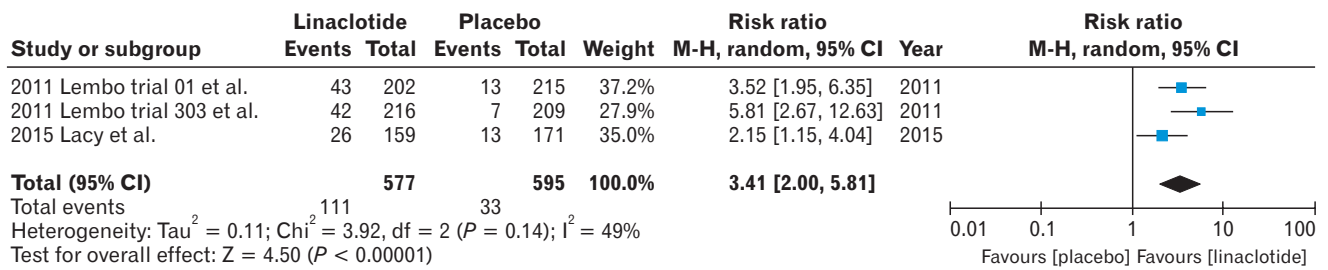

**Supplementary Figure 20.** Efficacy of linaclotide versus placebo in the treatment of chronic constipation (subgroup analysis with linaclotide 290 µg). M-H, Mantel-Haenszel.

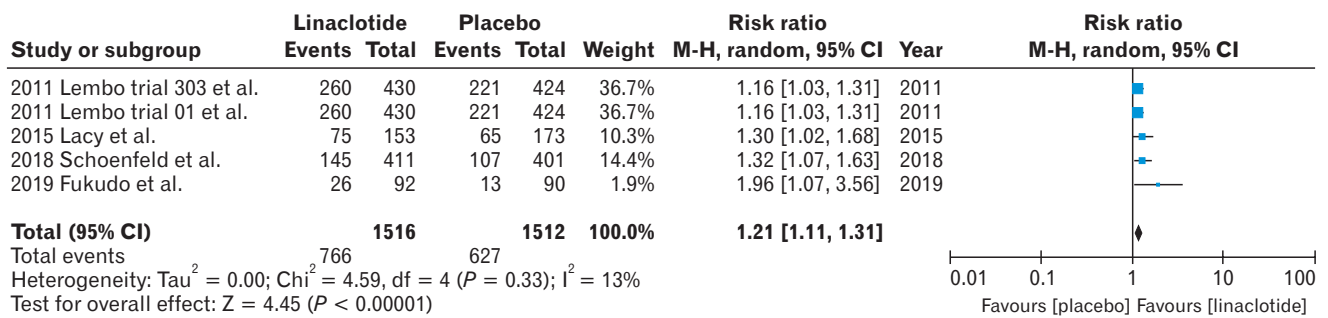

**Supplementary Figure 21.** Rate of adverse events related to linacotide versus placebo in the treatment of chronic constipation. M-H, Mantel-Haenszel.

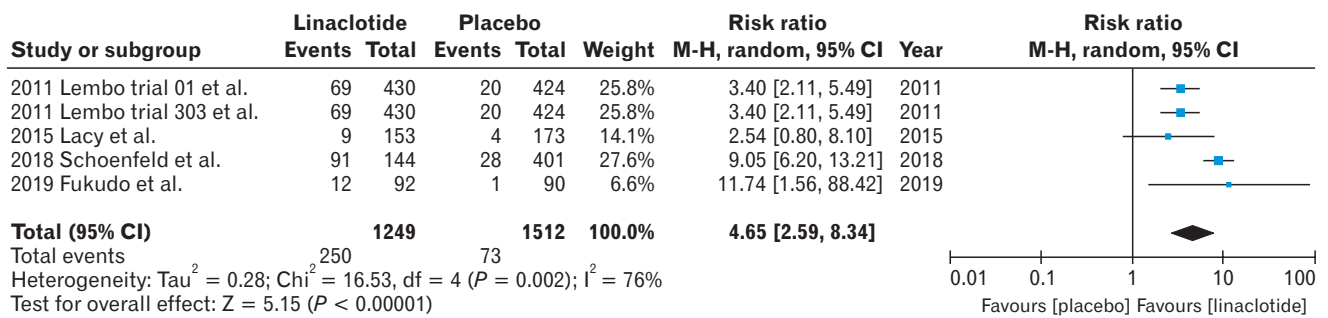

**Supplementary Figure 22.** Rate of diarrhea related to linacotide versus placebo in the treatment of chronic constipation. M-H, Mantel-Haenszel.

| <b>Linaclootide compared to placebo for chronic constipation</b> |                                                 |                                        |                                  |                                     |                                        |                 |
|------------------------------------------------------------------|-------------------------------------------------|----------------------------------------|----------------------------------|-------------------------------------|----------------------------------------|-----------------|
| <b>Patient or population:</b> patients with chronic constipation |                                                 |                                        |                                  |                                     |                                        |                 |
| <b>Settings:</b> RCT                                             |                                                 |                                        |                                  |                                     |                                        |                 |
| <b>Intervention:</b> Linaclootide                                |                                                 |                                        |                                  |                                     |                                        |                 |
| <b>Comparison:</b> placebo                                       |                                                 |                                        |                                  |                                     |                                        |                 |
| <b>Outcomes</b>                                                  | <b>Illustrative comparative risks* (95% CI)</b> |                                        | <b>Relative effect (95% CI)</b>  | <b>No of Participants (studies)</b> | <b>Quality of the evidence (GRADE)</b> | <b>Comments</b> |
|                                                                  | <b>Assumed risk Placebo</b>                     | <b>Corresponding risk Linaclootide</b> |                                  |                                     |                                        |                 |
| <b>Clinical improvement</b>                                      | <b>58 per 1000</b>                              | <b>178 per 1000</b><br>(127 to 248)    | <b>RR 3.06</b><br>(2.19 to 4.27) | 2171<br>(5 studies)                 | ⊕⊕⊕⊕<br><b>high</b>                    |                 |
| <b>Adverse events</b>                                            | <b>415 per 1000</b>                             | <b>502 per 1000</b><br>(460 to 543)    | <b>RR 1.21</b><br>(1.11 to 1.31) | 3028<br>(5 studies)                 | ⊕⊕⊕⊕<br><b>high</b>                    |                 |
| <b>Diarrhea a/w linaclootide treatment</b>                       | <b>48 per 1000</b>                              | <b>225 per 1000</b><br>(125 to 403)    | <b>RR 4.65</b><br>(2.59 to 8.34) | 2761<br>(5 studies)                 | ⊕⊕⊕⊕<br><b>high</b>                    |                 |

\*The basis for the **assumed risk** (e.g. the median control group risk across studies) is provided in footnotes. The **corresponding risk** (and its 95% confidence interval) is based on the assumed risk in the comparison group and the **relative effect** of the intervention (and its 95% CI).

**CI:** confidence interval; **RR:** risk ratio.

GRADE Working Group grades of evidence  
**High quality:** Further research is very unlikely to change our confidence in the estimate of effect.  
**Moderate quality:** Further research is likely to have an important impact on our confidence in the estimate of effect and may change the estimate.  
**Low quality:** Further research is very likely to have an important impact on our confidence in the estimate of effect and is likely to change the estimate.  
**Very low quality:** We are very uncertain about the estimate.

**Supplementary Figure 23.** Summary of findings: linaclootide compared to placebo for chronic idiopathic constipation.

## Supplementary References

- S1. Speed C, Heaven B, Adamson A, et al. LIFELAX - diet and LIFEstyle versus LAXatives in the management of chronic constipation in older people: randomised controlled trial. *Health Technol Assess* 2010;14:1-251.
- S2. Meshkinpour H, Selod S, Movahedi H, Nami N, James N, Wilson A. Effects of regular exercise in management of chronic idiopathic constipation. *Dig Dis Sci* 1998;43:2379-2383.
- S3. Tantawy SA, Kamel DM, Abdelbasset WK, Elgohary HM. Effects of a proposed physical activity and diet control to manage constipation in middle-aged obese women. *Diabetes Metab Syndr Obes* 2017;10:513-519.
- S4. Ashraf W, Park F, Lof J, Quigley EM. Effects of psyllium therapy on stool characteristics, colon transit and anorectal function in chronic idiopathic constipation. *Aliment Pharmacol Ther* 1995;9:639-647.
- S5. Fenn GC, Wilkinson PD, Lee CE, Akbar FA. A general practice study of the efficacy of Regulan in functional constipation. *Br J Clin Pract* 1986;40:192-197.
- S6. Nunes FP, Nunes CP, Levis E, et al. A double-blind trial of a celandin, aloevera and psyllium laxative preparation in adult patients with constipation. *Rev Bras Med* 2005;62:352-357.
- S7. Sturtzel B, Mikulits C, Gisinger C, Elmadfa I. Use of fiber instead of laxative treatment in a geriatric hospital to improve the wellbeing of seniors. *J Nutr Health Aging* 2009;13:136-139.
